# Supplementary material
Source: publisher figshare collection journal article supplement (https://acs.figshare.com/ndownloader/files/4150921)
Supplement: Supplementary file 1 [file 4150921]

Supporting online information for:

Free glucosylglycerate is a novel marker of  
nitrogen stress in *Mycobacterium smegmatis*

Volker Behrends<sup>1\*</sup>, Kerstin J. Williams<sup>2\*</sup>, Victoria A. Jenkins<sup>2</sup>, Brian D. Robertson<sup>2</sup>, Jacob  
G. Bundy<sup>1</sup>

1: Biomolecular Medicine, Department of Surgery and Cancer, Imperial College, London  
SW7 2AZ, UK

2: MRC Centre for Molecular Bacteriology and Infection, Department of Medicine, Imperial  
College, London SW7 2AZ, UK

\*These authors contributed equally to the study.

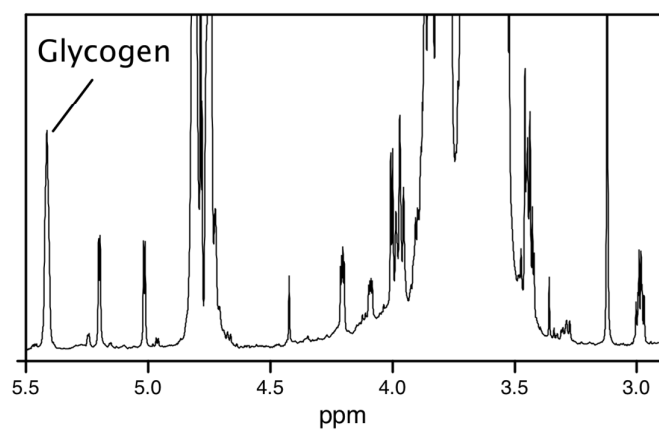

**Supporting Figure S1.** Characteristic glycogen resonance annotated on  $^1\text{H}$  NMR spectrum.

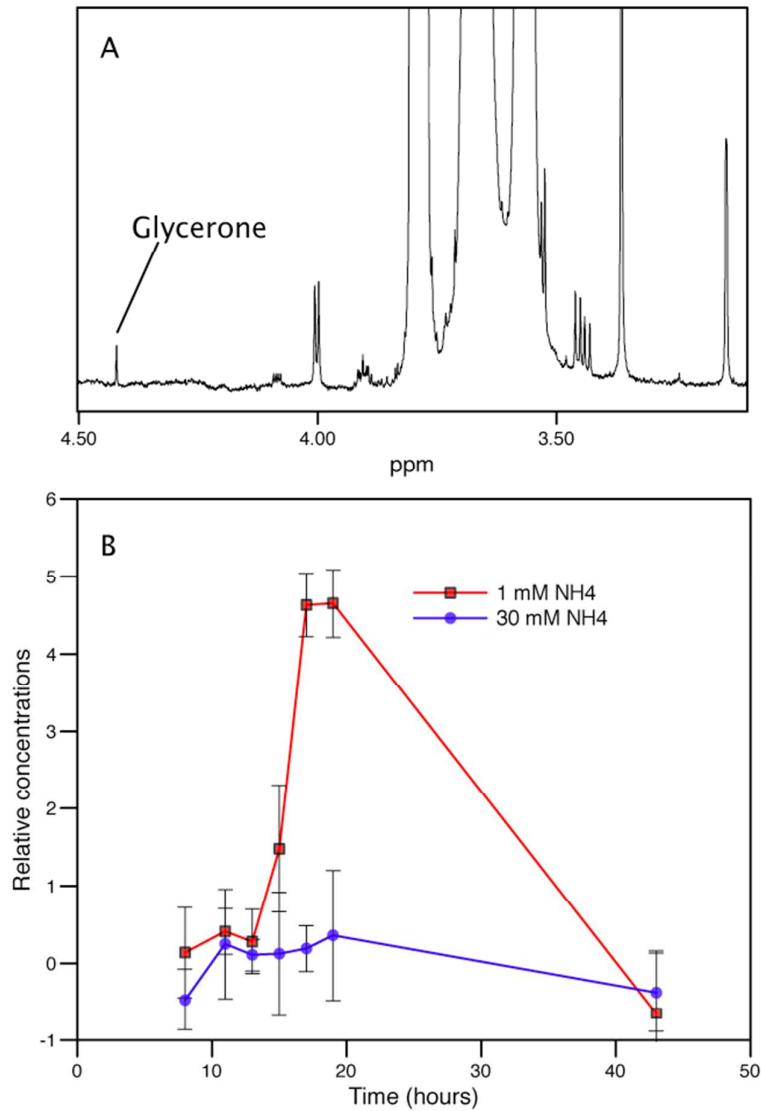

**Supporting Figure S2.** Detection and response of extracellular glycerone in *Mycobacterium smegmatis* cultures. A: glycerone annotated on  $^1\text{H}$  NMR spectrum. B: increase in extracellular glycerone in low-nitrogen cultures following nitrogen run-out. Error bars represent  $\pm$  SD ( $n = 3$ ).

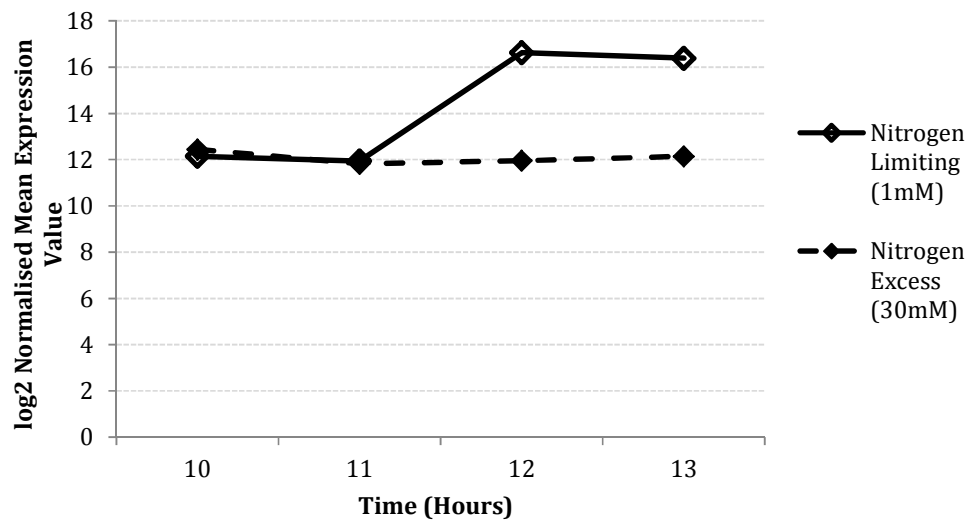

**Supporting Figure S3.** Expression of *gpgS* (glucosyl-3-phosphoglycerate synthase) is increased following nitrogen run out at 12 hours in nitrogen limiting cultures in *M. smegmatis*. Expression values are the mean of three biological replicates)

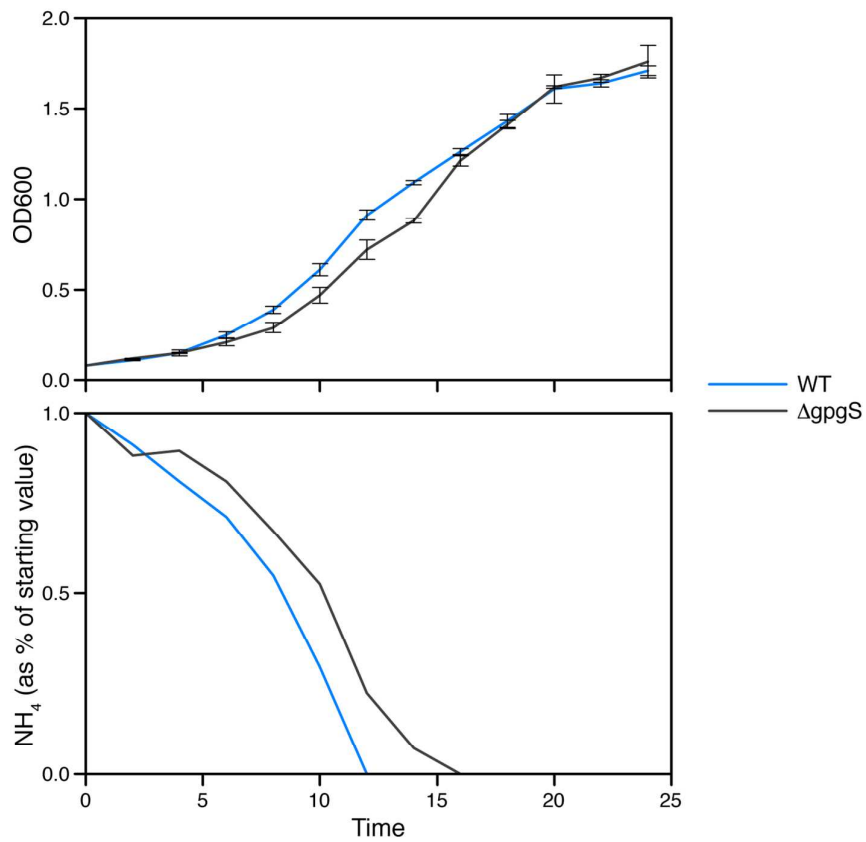

**Supporting Figure S4.** A glucosyl-3-phosphoglycerate synthase mutant ( $\Delta gpgS$ ) of *M. smegmatis* (A) has reduced growth rate in nitrogen-limiting conditions compared to wild type and (B) has reduced ammonium uptake rates from the growth medium compared to wild-type. Error bars +/- SEM (n = 3).

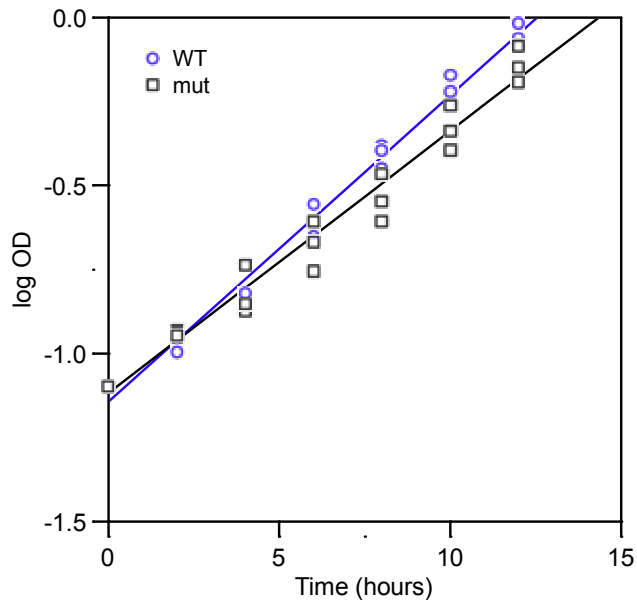

**Supporting Figure S5.** The reduction in growth rate of the *AgpgS* mutant compared to wild-type is statistically significant. Analysis of covariance (ANCOVA) of log-transformed OD<sub>600</sub> data up to the point of ammonium runout for the wild-type (12 hours); P = 0.0017, test for homogeneity of regression.
